# Supplementary material
Source: MDPI journal article supplement (https://www.mdpi.com/2311-7524/10/3/286)
Supplement: s1 [file s1]

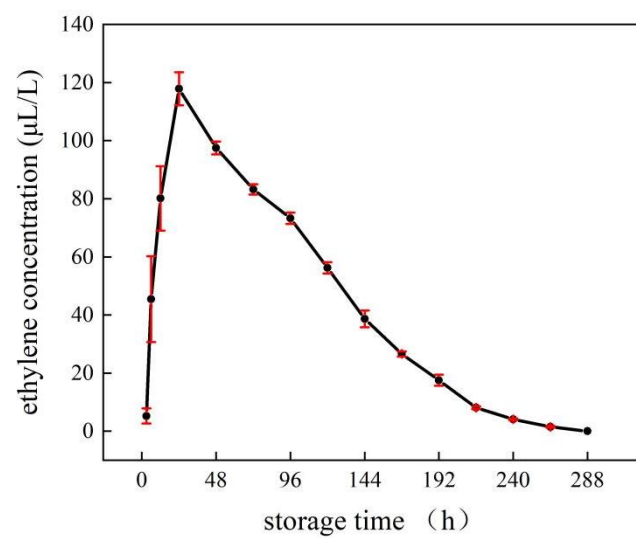

**Supplementary Figure S1.** The changes of exogenous Eth concentration during two weeks of storage.

**Supplementary Table S1.** Primers of the 10 genes in Aux signal transduction pathway and one internal control gene in potato.

| Gene ID                     |   | Primer Sequence (5'-3')      |
|-----------------------------|---|------------------------------|
| <i>PGSC0003DMG400008504</i> | F | TTCGTCGTTGGATTGTTGGTTCGG     |
|                             | R | ACACACCACATGTAAGGGAAGTATTGC  |
| <i>PGSC0003DMG400027712</i> | F | AGGTAGAGGTAAGGTCTGCGTACAC    |
|                             | R | CCTTGCTCTTTCAATAATGCGTCTGTC  |
| <i>PGSC0003DMG400006108</i> | F | TGTCTGGTTTGAGTCGTGAAAGTAGTC  |
|                             | R | TTTCTTAGATAAGGGGCACCATCCATG  |
| <i>PGSC0003DMG400003771</i> | F | CTGGATGTGGAGACAAGCAGAATAGAG  |
|                             | R | AACACCGCATTGAAGACCAGTAAGG    |
| <i>PGSC0003DMG400012261</i> | F | AAGATTCTGCGTGGCGATCCTTG      |
|                             | R | GCACTTCTACTGTCTTCTGTCTCATCC  |
| <i>PGSC0003DMG400025856</i> | F | ACAACAACCTTCCTCACCTACCAATCTC |
|                             | R | GCATTCTCTACGGCTCTCTGTAATC    |
| <i>PGSC0003DMG400024997</i> | F | CCAACAACAGAGGAAGAGAACAGGAG   |
|                             | R | AAGAATCGCATAGCACGGATGAAGG    |
| <i>PGSC0003DMG400025017</i> | F | TGAGTTCGCACCAATTCACAGAGAC    |
|                             | R | CTTCATCAGTCTTGTCGGAATCAATGC  |
| <i>PGSC0003DMG400003773</i> | F | AGTAAGTTCCGTCGATGAAGAAAGTGG  |
|                             | R | GCATACCCCTCTCCAGATAATTTCCAG  |
| <i>PGSC0003DMG400001655</i> | F | TGATTATTGGAGATGTCGCCTGAGATC  |
|                             | R | TCATCGCAAGGTATAGCCAAAGTTCC   |
| <i>Actin</i>                | F | GCTTCCCGATGGTCAAGTCA         |
| (internal control gene)     | R | GGATTCCAGCTGCTTCCATTC        |

**Supplementary Table S2.** FPKM values of 10 DEGs associated with Aux signal transduction pathway.

| Description    |    |                      | Gene ID |  |  |  |  | FPKM value |          |          |          |          |
|----------------|----|----------------------|---------|--|--|--|--|------------|----------|----------|----------|----------|
|                |    |                      |         |  |  |  |  |            |          |          |          |          |
|                |    |                      |         |  |  |  |  | CK         | CK_1W    | CK_2W    | Eth_1W   | Eth_2W   |
| <i>AUX1</i>    | 1  | PGSC0003DMG400008504 |         |  |  |  |  | 11.73571   | 46.12852 | 53.19666 | 52.89404 | 35.75633 |
| <i>TIR1</i>    | 2  | PGSC0003DMG400027712 |         |  |  |  |  | 5.12701    | 1.97748  | 1.97273  | 2.85156  | 2.55556  |
| <i>AUX/IAA</i> | 3  | PGSC0003DMG400006108 |         |  |  |  |  | 9.76968    | 87.04576 | 98.60684 | 16.64124 | 17.48229 |
| <i>ARF</i>     | 4  | PGSC0003DMG400003771 |         |  |  |  |  | 3.34439    | 9.27224  | 6.14314  | 3.77786  | 5.71589  |
|                | 5  | PGSC0003DMG400012261 |         |  |  |  |  | 1.28610    | 2.37183  | 1.57004  | 0.96628  | 0.46133  |
| <i>GH3</i>     | 6  | PGSC0003DMG400025856 |         |  |  |  |  | 1.15802    | 6.85351  | 10.49143 | 0.77127  | 1.11731  |
|                | 7  | PGSC0003DMG400024997 |         |  |  |  |  | 9.73351    | 22.96470 | 27.06788 | 17.25527 | 11.56372 |
|                | 8  | PGSC0003DMG400025017 |         |  |  |  |  | 11.58659   | 7.18616  | 3.57993  | 9.36756  | 4.35974  |
| <i>SAUR</i>    | 9  | PGSC0003DMG400003773 |         |  |  |  |  | 0.02565    | 18.22731 | 12.66047 | 0.53062  | 0.38010  |
|                | 10 | PGSC0003DMG400001655 |         |  |  |  |  | 0.49953    | 6.48770  | 5.77096  | 4.46177  | 3.97520  |
